# Supplementary material
Source: ML conference proceedings conference paper supplement (https://proceedings.neurips.cc/paper_files/paper/2019/hash/dd03de08bfdff4d8ab01117276564cc7-Abstract.html)
Supplement: Supplementary file [file dd03de08bfdff4d8ab01117276564cc7-Supplemental.zip]

---

# Recurrent Registration Neural Networks for Deformable Image Registration: Supplementary Material

---

**Robin Sandkühler**

Department of Biomedical Engineering  
University of Basel, Switzerland  
robin.sandkuehler@unibas.ch

**Simon Andermatt**

Department of Biomedical Engineering  
University of Basel, Switzerland  
simon.anderstatt@unibas.ch

**Grzegorz Bauman**

Division of Radiological Physics  
Department of Radiology  
University of Basel Hospital, Switzerland  
grzegorz.bauman@usb.ch

**Sylvia Nyilas**

Pediatric Respiratory Medicine  
Department of Pediatrics  
Inselspital, Bern University Hospital  
University of Bern, Switzerland

**Christoph Jud**

Department of Biomedical Engineering  
University of Basel, Switzerland  
christoph.jud@unibas.ch

**Philippe C. Cattin**

Department of Biomedical Engineering  
University of Basel, Switzerland  
philippe.cattin@unibas.ch

## 1 Supplementary Material

In this document, we present additional information and results of the R2N2 registration algorithm.

## 2 Network Training

Algorithm 1 shows an overview of the training procedure of the presented *Recurrent Registration Neural Network* (R2N2).

---

**Algorithm 1** Training procedure of the R2N2

---

```

 $\theta \leftarrow$  Initialize network parameters
 $i \leftarrow 0$ 
for  $i < \text{number of training iterations}$  do
   $M_i, F_i \leftarrow$  Sample image pair from training set
   $f_0 \leftarrow 0$            Initialize transformation
   $\mathcal{L}_S \leftarrow 0$        Initialize sequence image loss
   $W_0 \leftarrow M_i$ 
   $t \leftarrow 1$ 
  for  $t < \text{number of max transformations } T$  do
     $g_t \leftarrow \text{R2N2}(F_i, W_{t-1}, \theta)$    Evaluate model
     $f_t \leftarrow f_{t-1} + l(g_t)$            Update transformation
     $W_t \leftarrow M_i \circ f_t$              Transform  $M_i$ 
     $\mathcal{L}_S \leftarrow \mathcal{L}_S + \mathcal{S}[F_i, W_t]$    Calculate image loss
     $t \leftarrow t + 1$ 
  end for
   $\mathcal{L}_R \leftarrow \mathcal{R}[f_T]$                Calculate regularizer loss
   $\mathcal{L} \leftarrow \mathcal{L}_S + \lambda \mathcal{L}_R$          Final loss
  Compute the gradient  $\frac{\partial \mathcal{L}}{\partial \theta}$ 
  Update the network parameters  $\theta$ 
   $i \leftarrow i + 1$ 
end for

```

---

### 3 Results

In the following, we show detailed results of the presented *Recurrent Registration Neural Network* for the registration of one image pair. Figure 3-7 visualize the input and output of the R2N2 at each time step  $t$  during the registration. We can observe a decreasing tendency of the shape parameter  $\sigma_t$  (Figure 1) and the weight parameter  $v_t$  (Figure 2) during the registration. That shows that our network achieves a coarse correction of large misalignments during the first steps and then continues with the finer ones. This registration procedure is very similar to how a human would align two images by applying a sequence of local deformations. The difference between the weight value  $v_x$  and the weight value  $v_y$  (Figure 2) can be explained by the fact that the major misalignment of the lung images are evoked by the breathing motion of the patient, which is oriented along the  $y$ -direction.

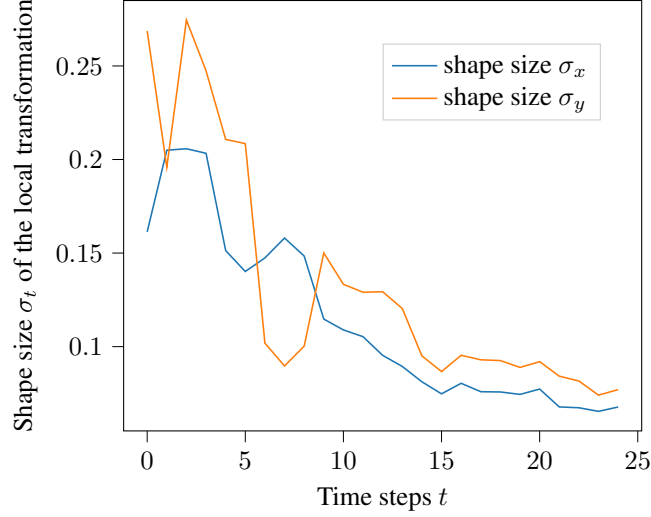

Figure 1: Shape size  $\sigma_x$  and  $\sigma_y$  of the local transformation outputted by the R2N2 at each time step  $t$  for one image pair.

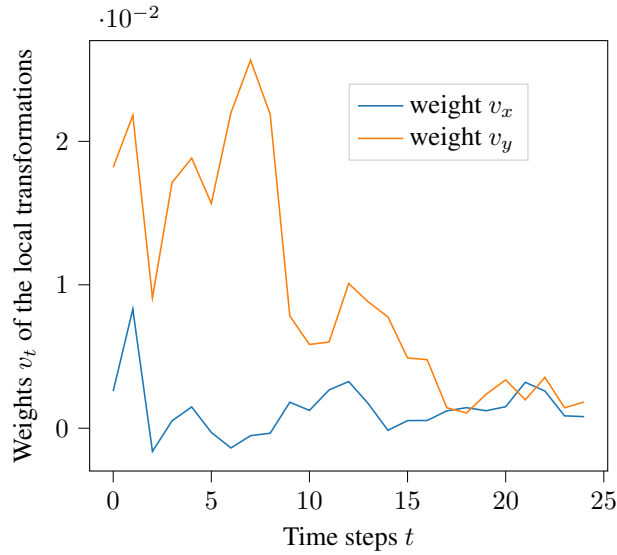

Figure 2: Wights  $v_x$  and  $v_y$  of the local transformation outputted by the R2N2 at each time step  $t$  for one image pair.

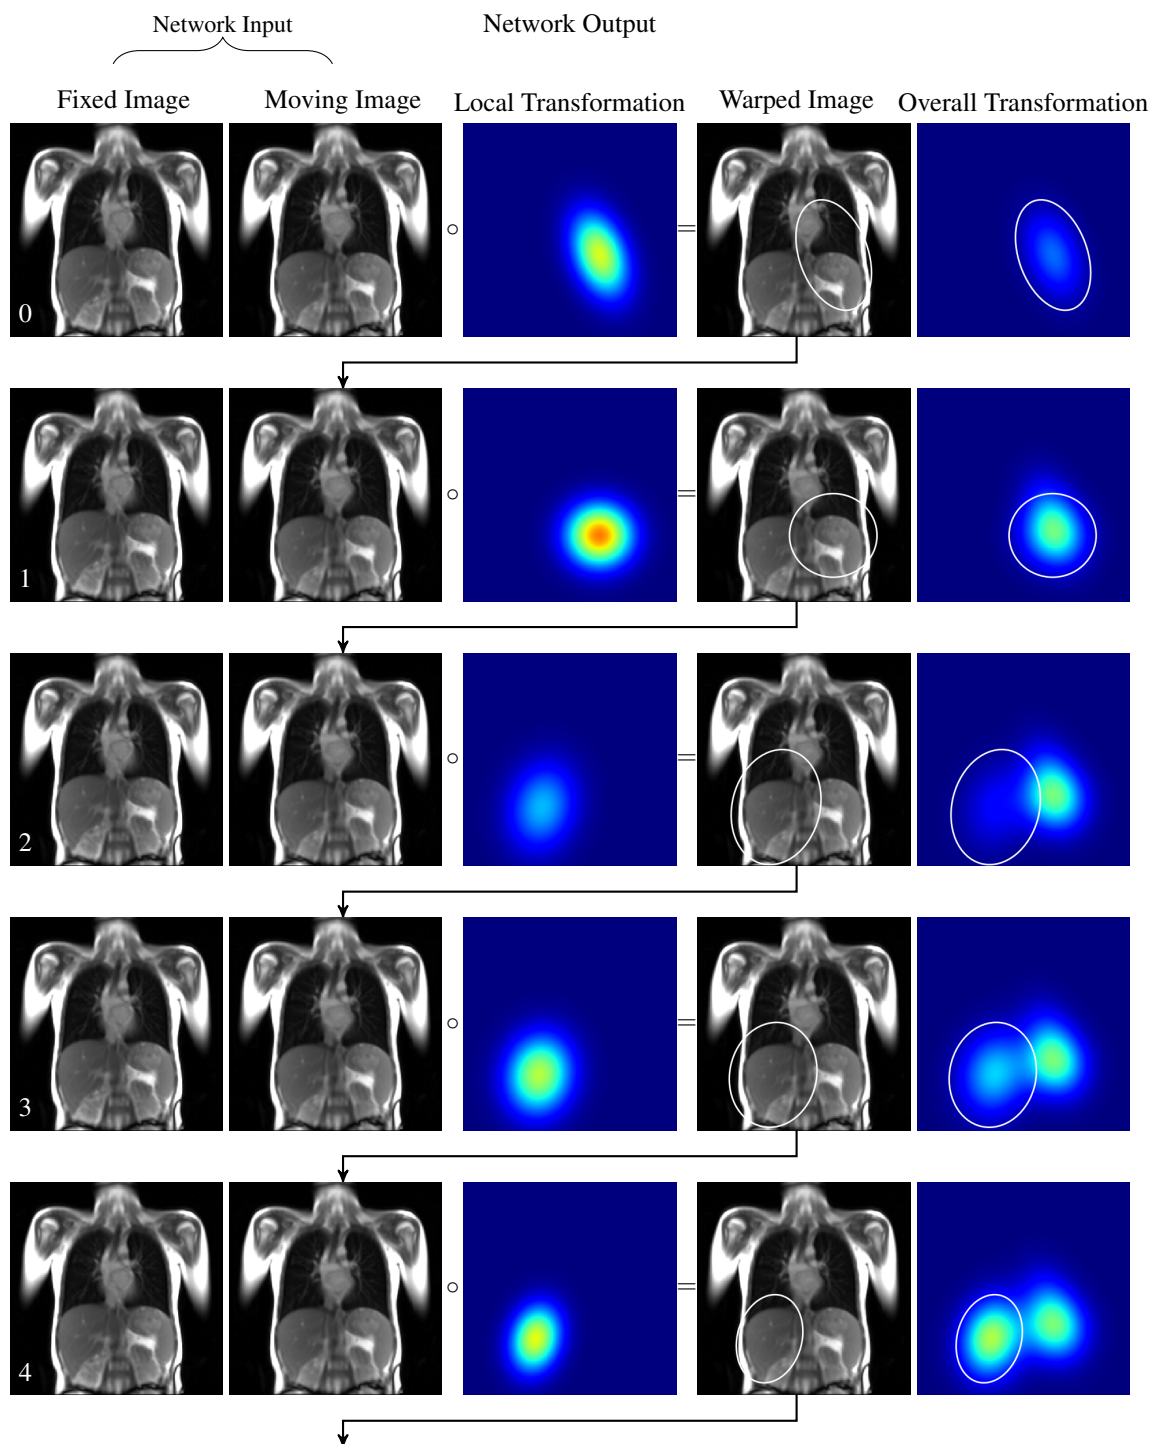

Figure 3: Input and output for the R2N2 network for the time steps 0 – 4 during the registration of one image pair. Here,  $\circ$  is the transformation of the image on the left side with the transformation on the right side.

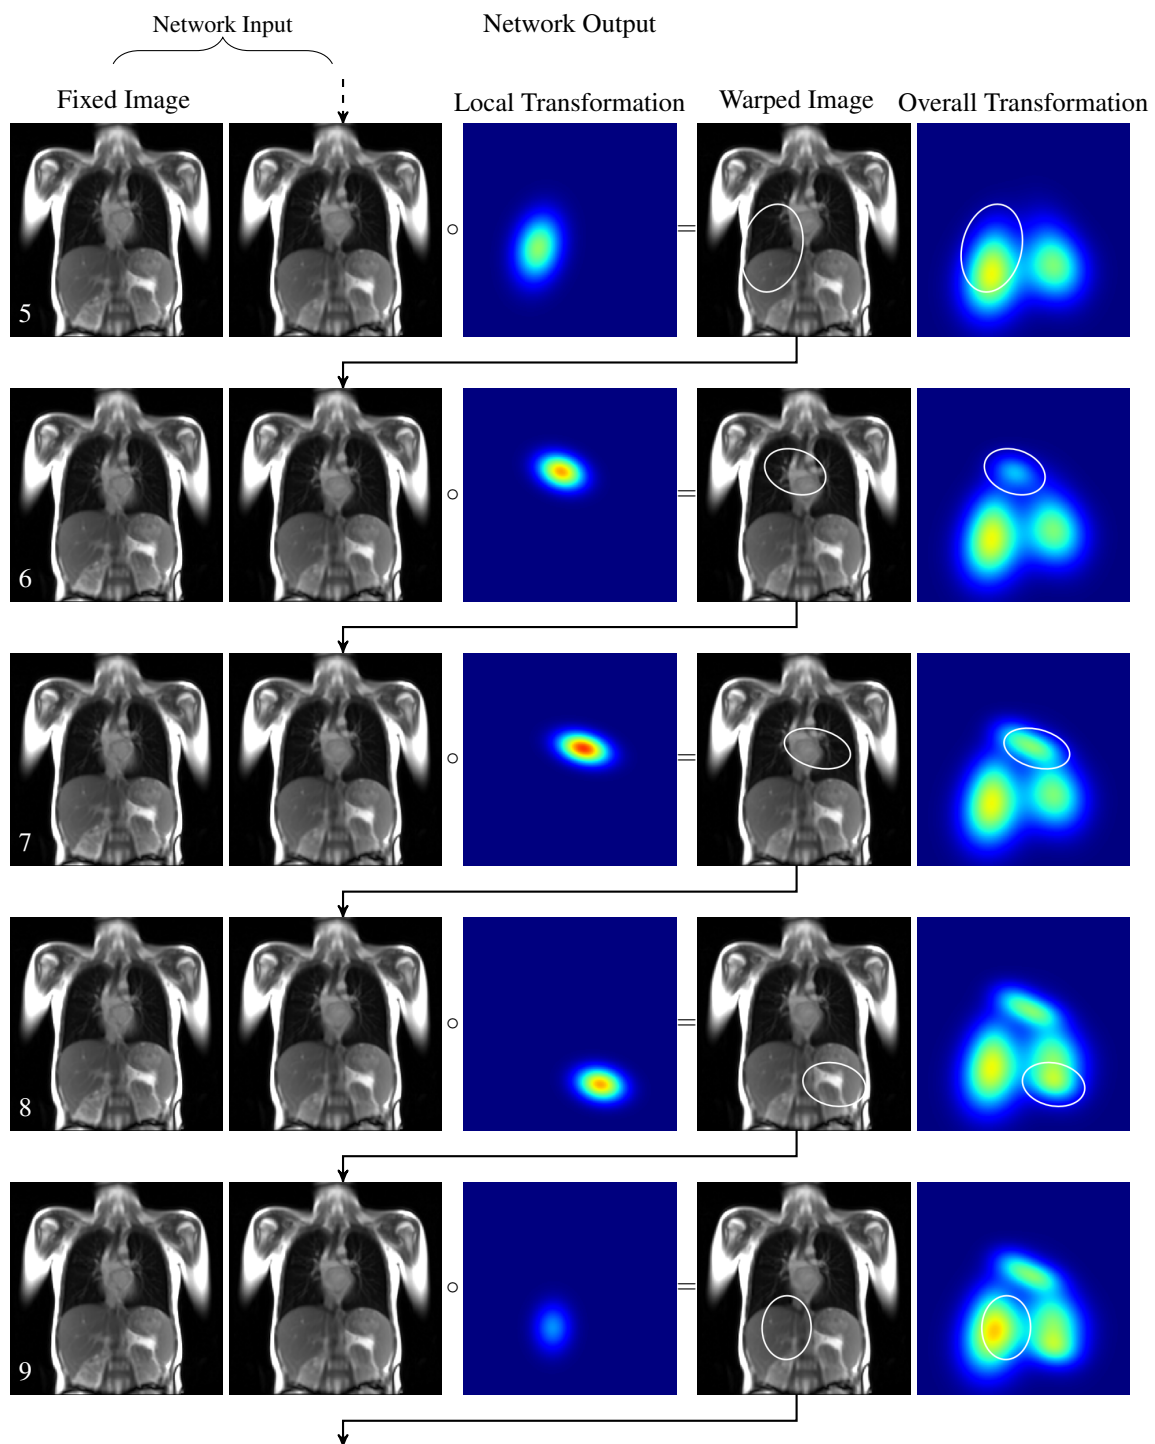

Figure 4: Input and output for the R2N2 network for the time steps 5 – 9 during the registration of one image pair. Here,  $\circ$  is the transformation of the image on the left side with the transformation on the right side.

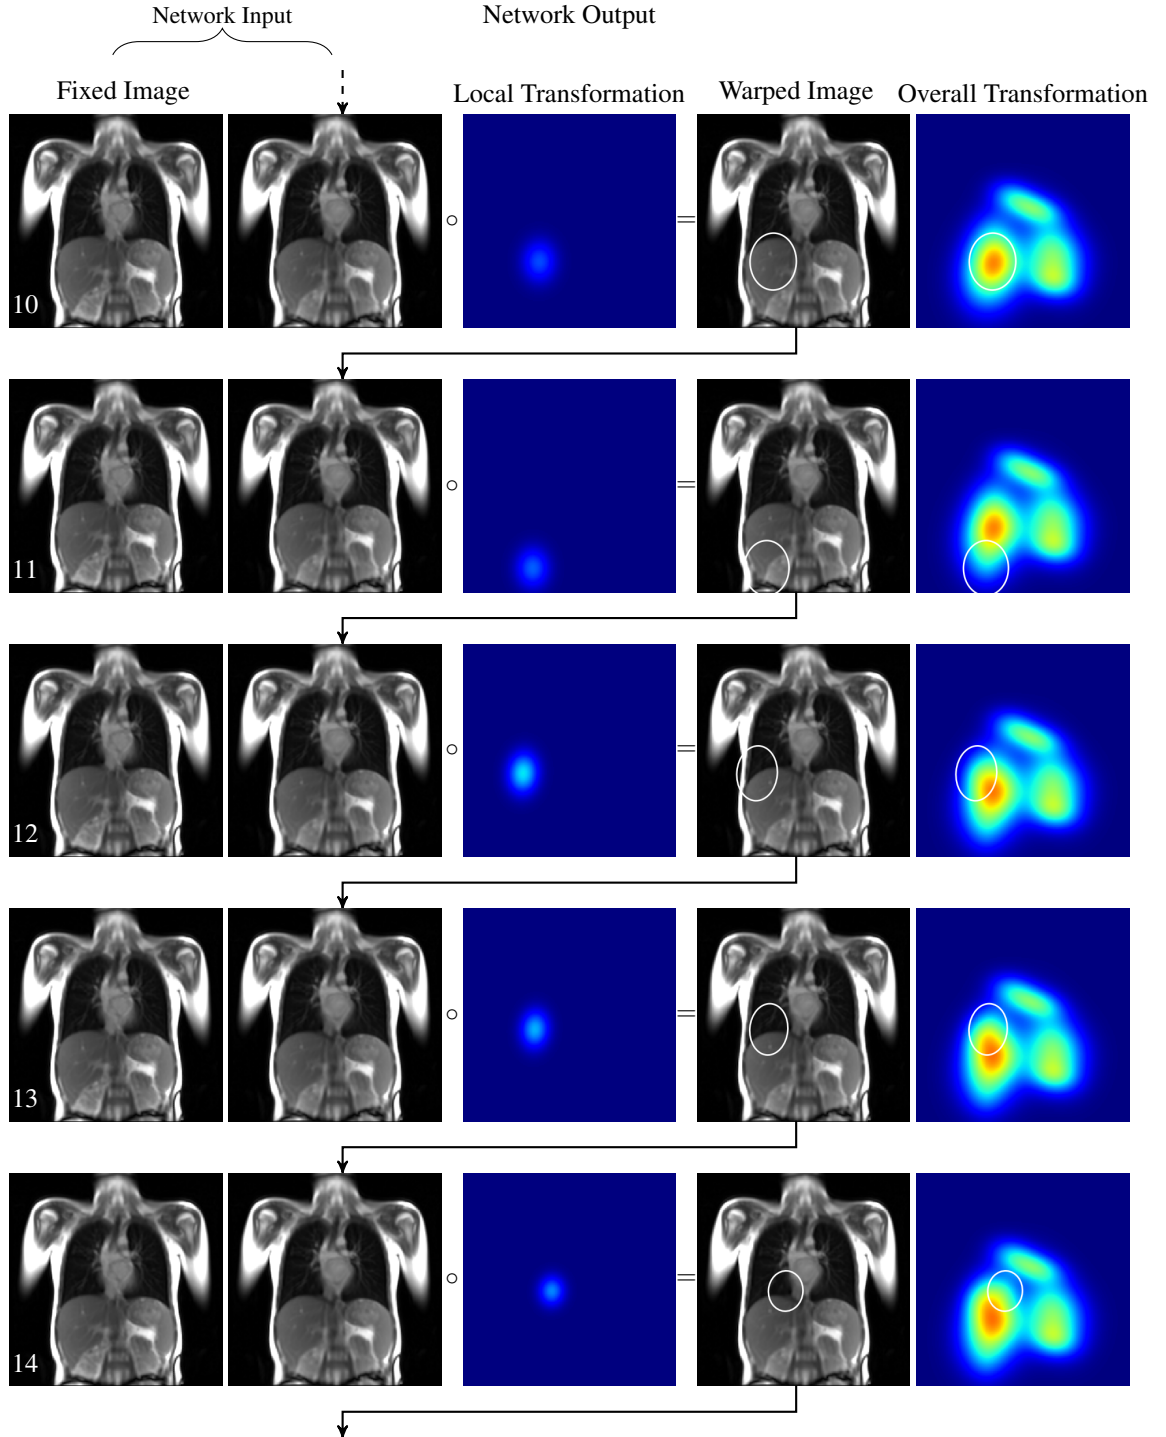

Figure 5: Input and output for the R2N2 network for the time steps 10 – 14 during the registration of one image pair. Here,  $\circ$  is the transformation of the image on the left side with the transformation on the right side.

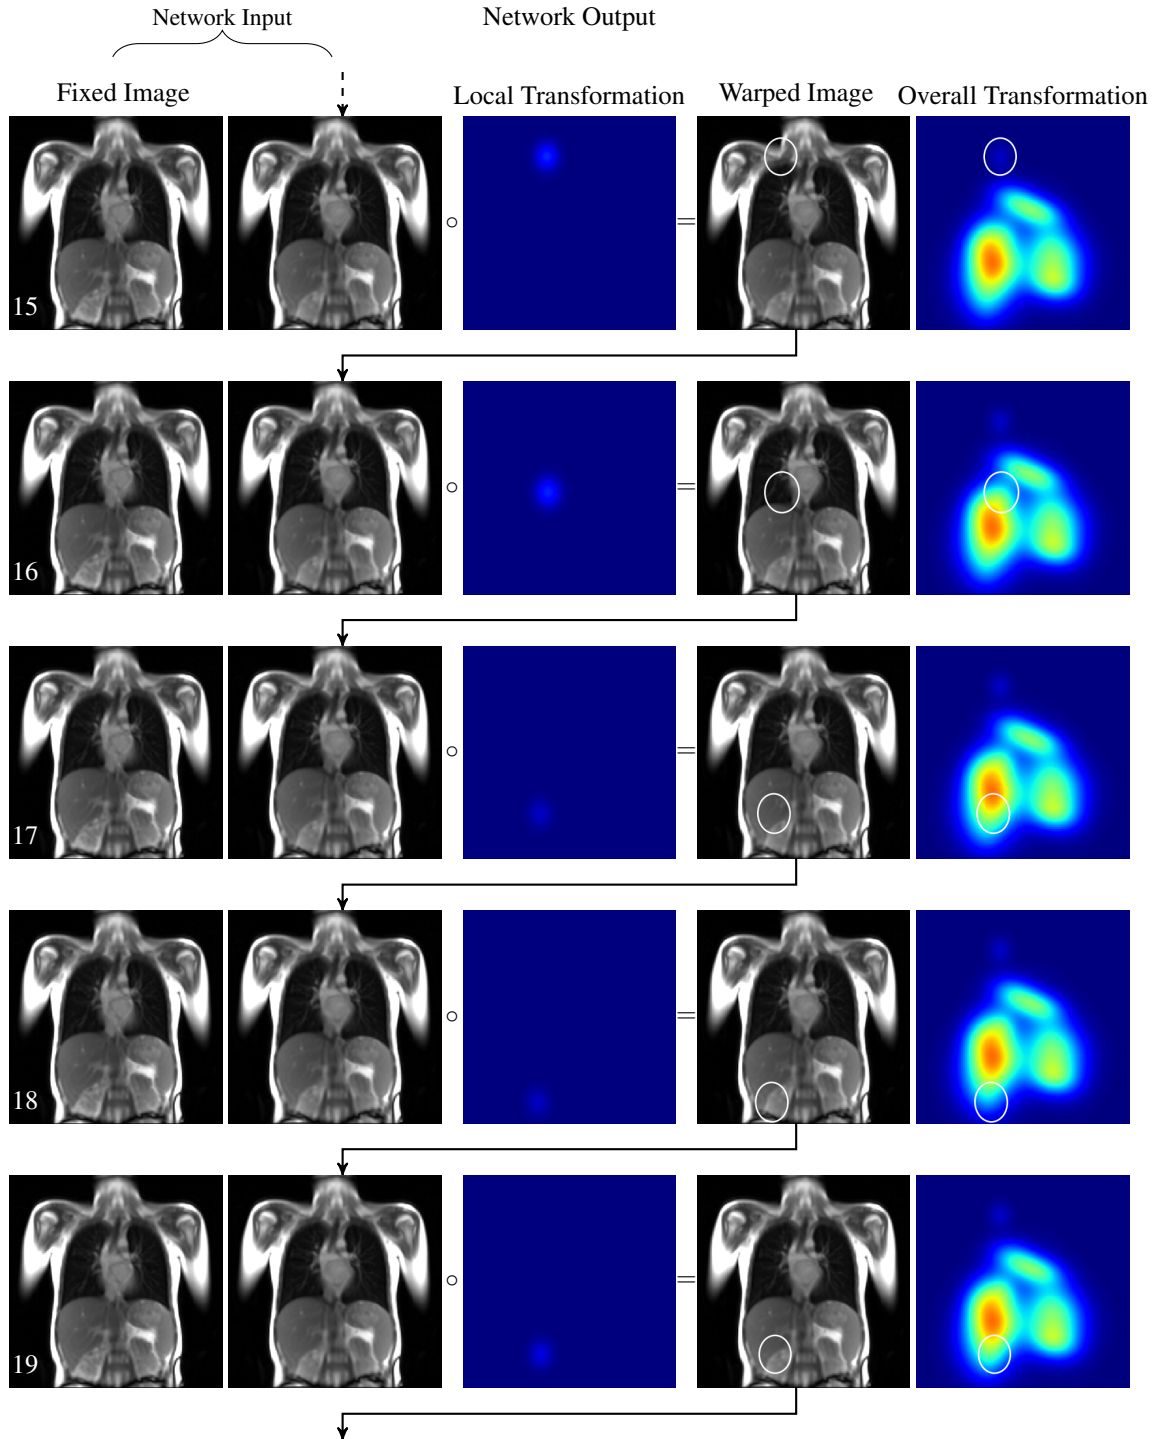

Figure 6: Input and output for the R2N2 network for the time steps 15 – 19 during the registration of one image pair. Here,  $\circ$  is the transformation of the image on the left side with the transformation on the right side.



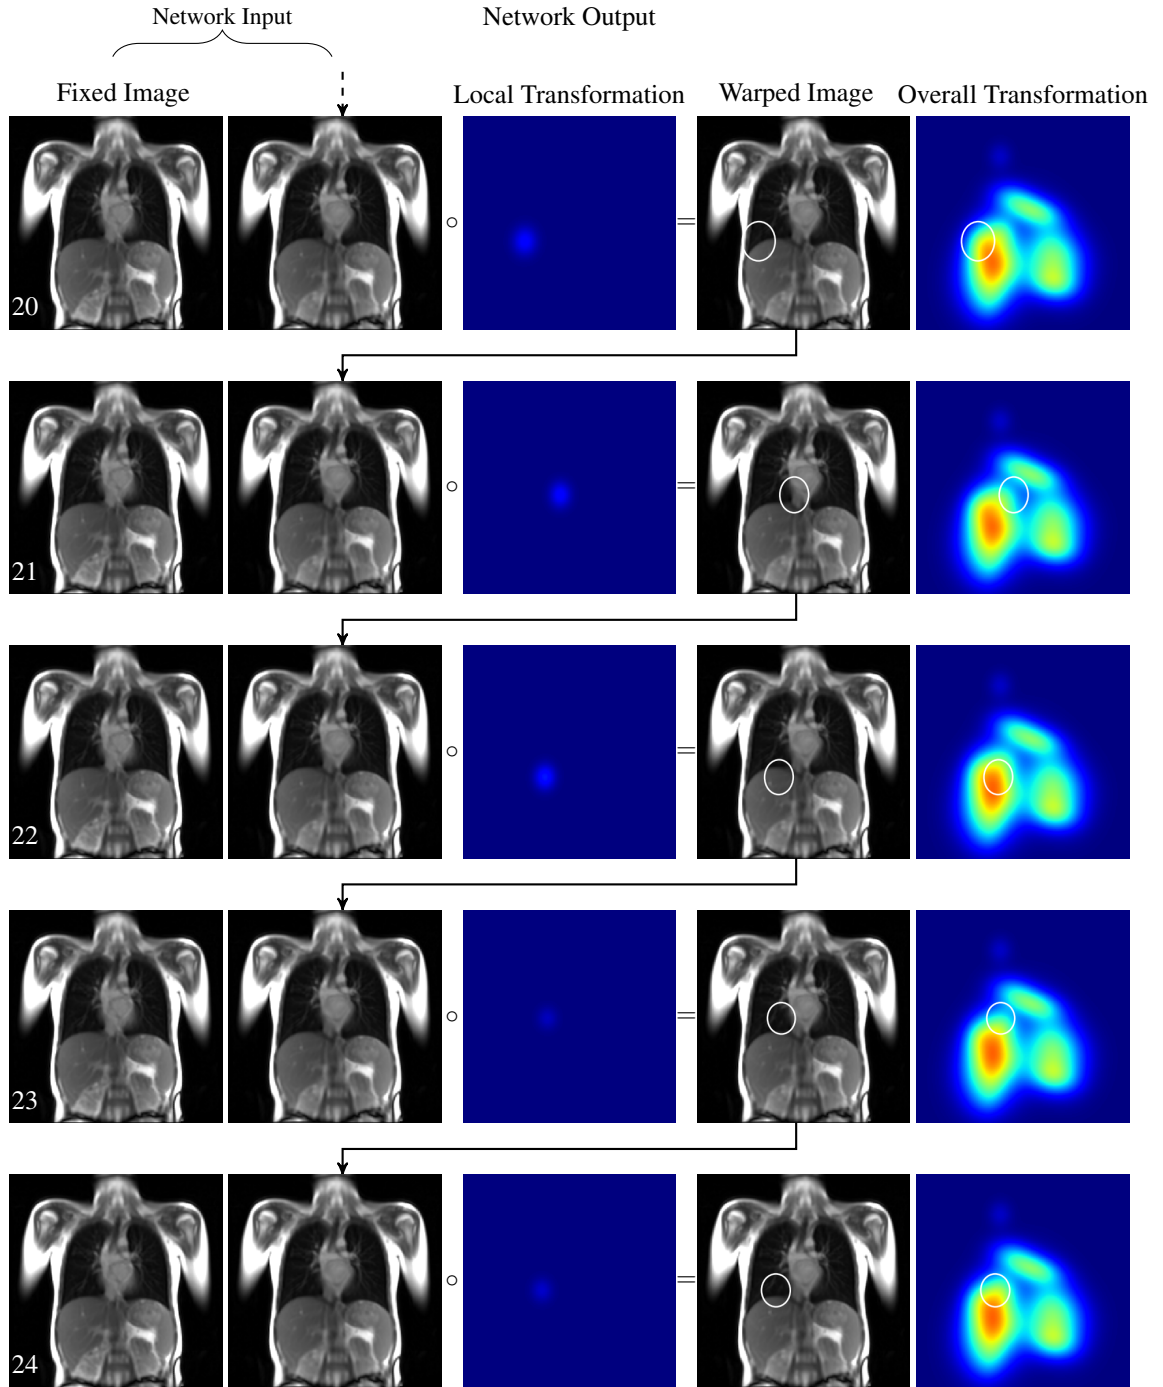

Figure 7: Input and output for the R2N2 network for the time steps 20 – 24 during the registration of one image pair. Here,  $\circ$  is the transformation of the image on the left side with the transformation on the right side.
